# Supplementary material
Source: Springer Nature journal article supplement (https://www.springermedizin.de/resource/supplementary/13012_2013_686_MOESM3_ESM.pdf/9630244)

# Search Strategy Development

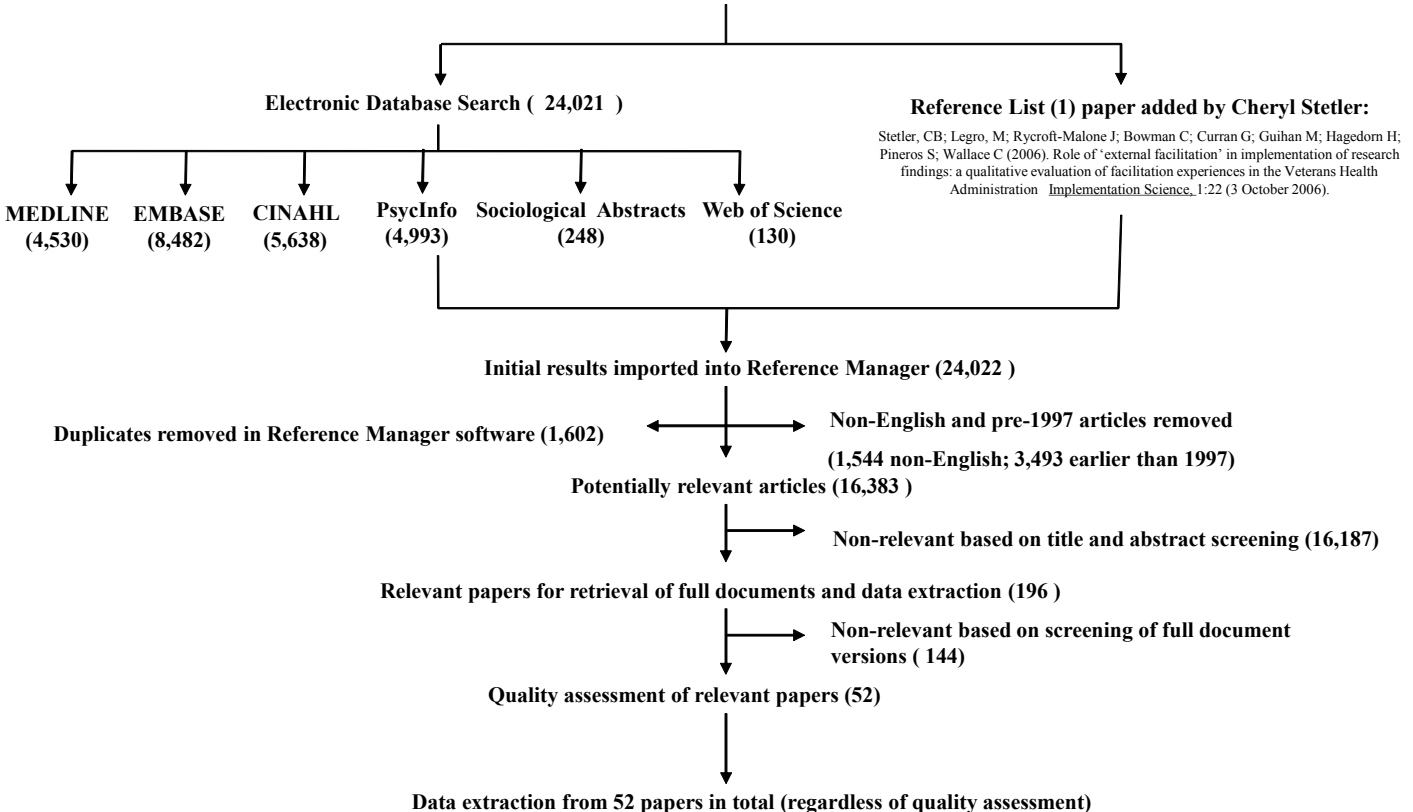

Supplement: MOESM3 [file 9630244]
